# Supplementary material for: A general approach to directing assembly behavior of gold colloids by co-polymer molecules, and tracking and imaging solution nanostructures of the polymer molecules
Source: Royal Society of Chemistry journal article supplement (doi:10.1039/b903327k), 2009-01-01
Supplement: b903327k.pdf [file b903327k.pdf]

**Supplementary information (SI)**  
**A General Approach to Directing Assembly Behavior of Gold Colloids by Co-polymer Molecules, and Tracking and Imaging Solution Nanostructures of the Polymer Molecules**

Ziyi Zhong<sup>\*a</sup>, Hongting Lee<sup>a</sup>, Shoucang Shen<sup>a</sup>, Aharon Gedanken<sup>\*b</sup>

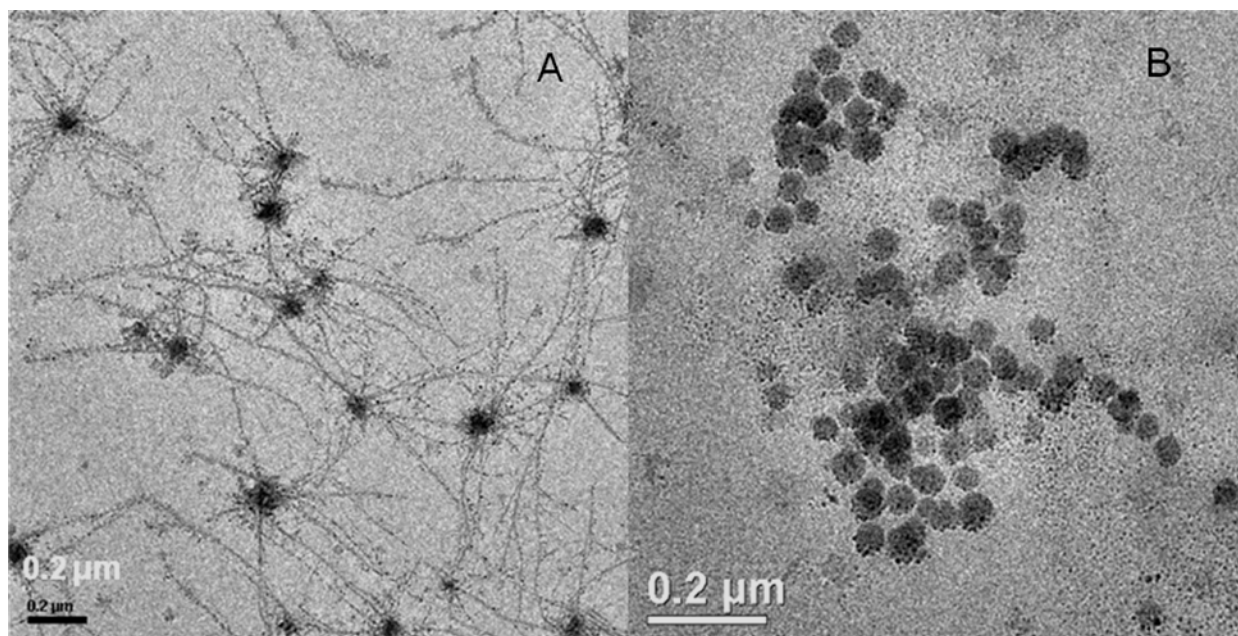

S1. TEM images for the Au/P123 sample prepared at room temperature at a P123/Au molar ratio of 45:1 and after an aging of 5hrs (A) and 72 hrs (B) respectively.

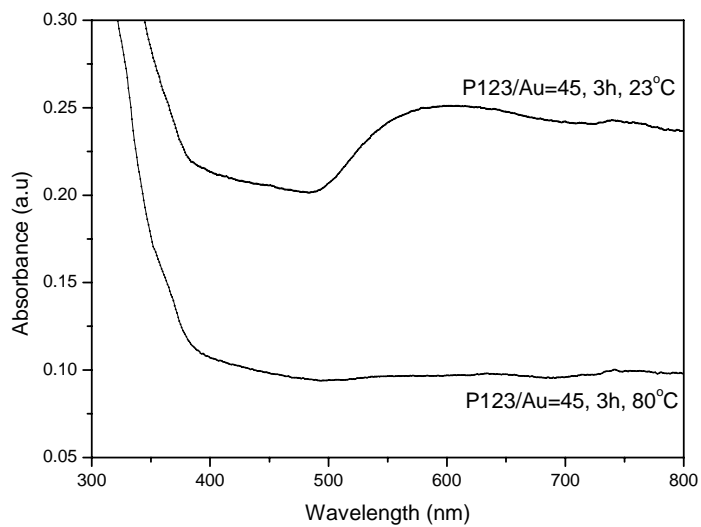

S2. UV-vis spectra for Au/P123 sample prepared at different temperatures.

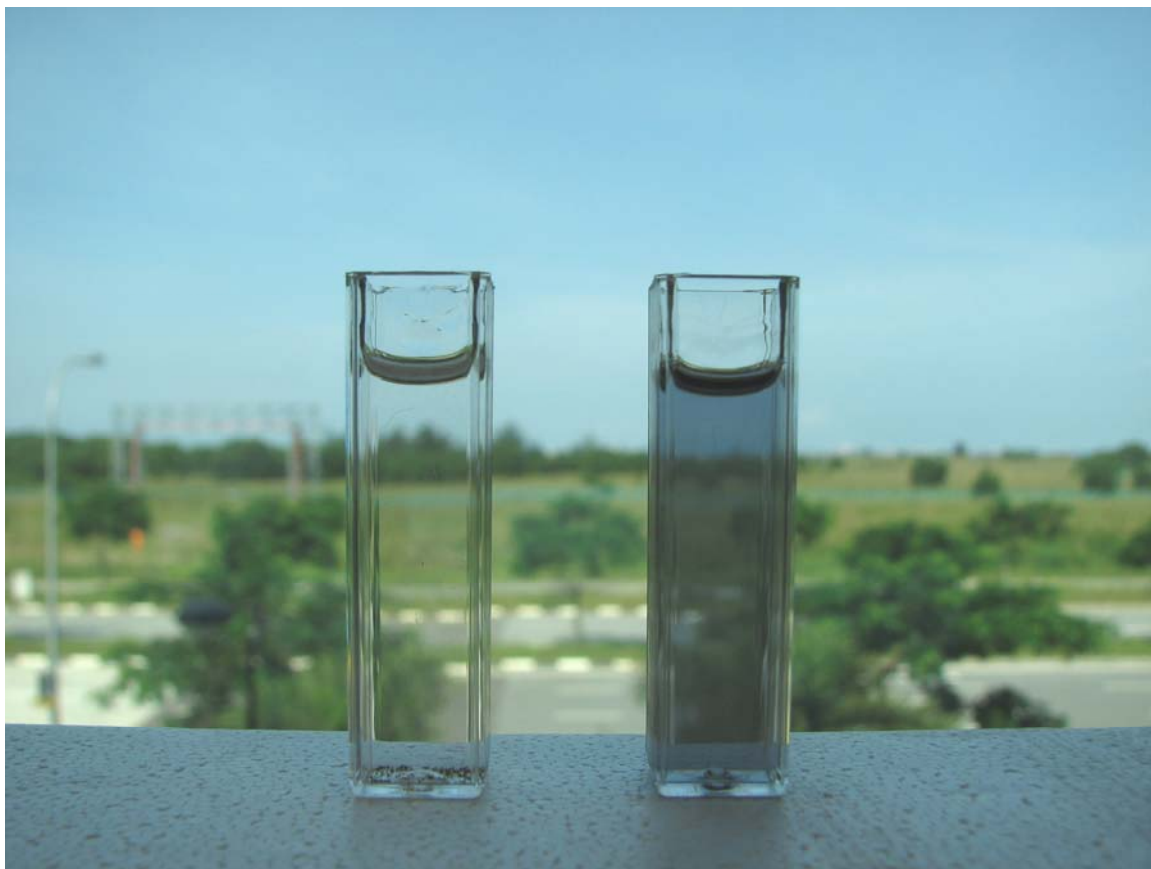

S3: Photographs of the Au/P123 composites prepared at a P123/Au molar ratio of 45/1 (left) and of 100:1 (right). The samples were aged at room temperature for 72hrs.
